# Supplementary material for: Fluorocarbon Plasma-Polymerized Layer Increases the Release Time of Silver Ions and the Antibacterial Activity of Silver-Based Coatings
Source: MDPI journal article supplement (doi:10.3390/nano14070609), 2024-03-29
Supplement: s1 [file s1]

# Fluorocarbon plasma-polymerized layer increases the release time of silver ions and the antibacterial activity of silver-based coatings

Linda Bonilla-Gameros<sup>1</sup>, Pascale Chevallier<sup>1</sup>, Xavier Delvaux<sup>2</sup>, Lidi Astrid Yáñez-Hernández<sup>1</sup>, Laurent Houssiau<sup>2</sup>, Xavier Minne<sup>3</sup>, Vanessa P. Houde<sup>3</sup>, Andranik Sarkissian<sup>4</sup> and Diego Mantovani<sup>1</sup>

<sup>1</sup> Laboratory for Biomaterials and Bioengineering, (CRC-Tier I), Dept of Min-Met-Materials Eng and Regenerative Medicine, CHU de Quebec, Laval University, Quebec City, Canada

<sup>2</sup> Laboratoire Interdisciplinaire de Spectroscopie Electronique, Namur Institute of Structured Matter, University of Namur, 61 Rue de Bruxelles, 5000 Namur, Belgium

<sup>3</sup> Oral Ecology Research Group (GREB), Faculty of Dentistry, Université Laval, 2420 rue de la Terrasse, Québec, QC G1V 0A6, Canada

<sup>4</sup> Plasmionique Inc, 171-1650 Boul Lionel Boulet, Varennes, QC J3X1S2, Canada

## Supplementary data

**Figure S1:** a) High resolution XPS spectra of Ag 3d and b) AES spectra of Ag MNN region for a-C:H:Ag (top) and a-C:H:AgO (bottom).

**Figure S2:** WCA images of the uncoated and CF<sub>x</sub> coated a-C:H samples depending on the duty cycle used and their respective WCA values.

**Figure S3:** Particle size distribution and AFM images of a) a-C:H:Ag and b) a-C:H:AgO coatings before CF<sub>x</sub> deposition.

**Figure S4:** Percentage of *E. coli* growth after 4 h in contact with Si (as negative control), 5.3CF<sub>x</sub>/a-C:H:Ag, and 5.3CF<sub>x</sub>/a-C:H:AgO.

High resolution of X-ray photoelectron spectroscopy (XPS) of Ag 3d spectra and Auger electron spectroscopy (AES) of Ag MNN region were used to analyze the chemical states of Ag in a-C:H:Ag and a-C:H:AgO samples before the deposition of the CF<sub>x</sub> film. The fittings and positions of Ag 3d components ( $3d^{3/2}$  and  $3d^{5/2}$ ) are shown in **Figure S1a**. The main peak attributed to Ag-Ag bond was fitted at  $368.40 \pm 0.06$  eV for a-C:H:Ag and at  $368.42 \pm 0.07$  eV for a-C:H:AgO with obtained chi-square ( $\chi^2$ ) values of  $1.6 \pm 0.2$  and  $1.3 \pm 0.1$ , respectively. In this sense, the Ag MNN Auger spectra (**Figure S1b**) for a-C:H:Ag and a-C:H:AgO were studied and showed the two principal Auger transitions of each structure assigned to Ag  $M_5N_{45}N_{45}$  and Ag  $M_4N_{45}N_{45}$ . In this sense, the main differences between both samples lie in the full width at half maximum (FWHM) of the Ag  $3d^{5/2}$  peak and the value of the modified Auger parameter ( $\alpha'$ ):  $1.07 \pm 0.01$  eV and  $725.5 \pm 0.2$  eV for a-C:H:Ag,  $1.15 \pm 0.02$  eV and  $724.8 \pm 0.5$  eV for a-C:H:AgO.

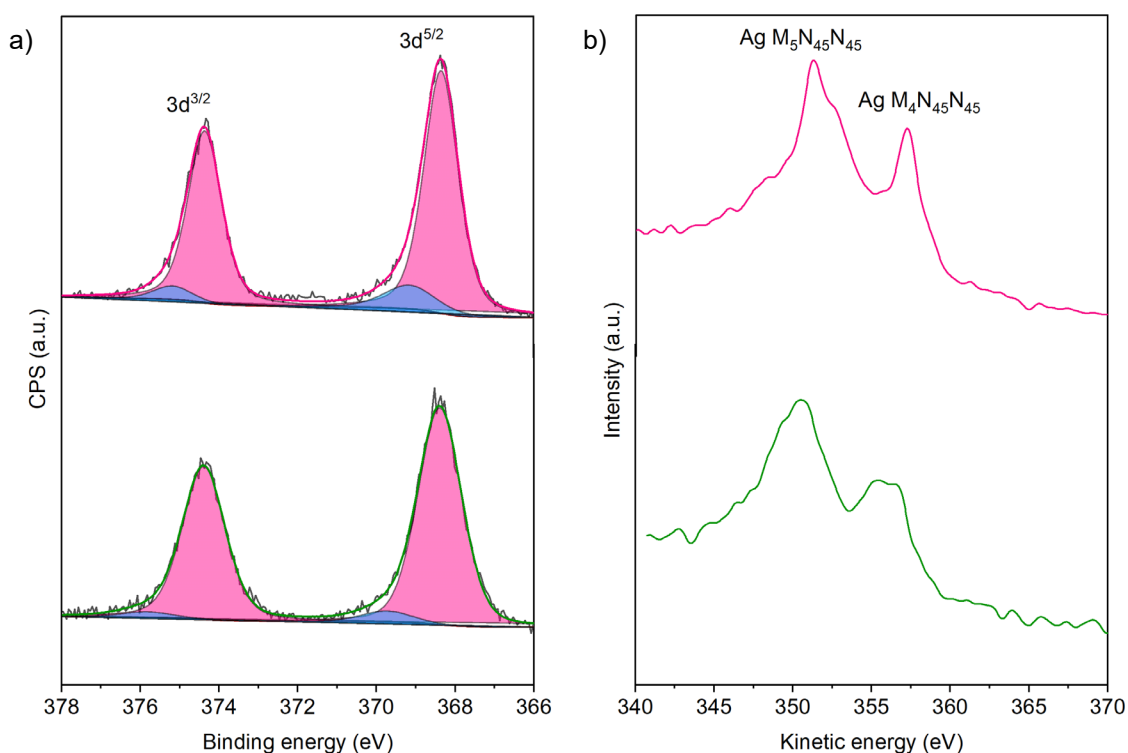

**Figure S1:** a) High resolution XPS spectra of Ag 3d and b) AES spectra of Ag MNN region for a-C:H:Ag (top) and a-C:H:AgO (bottom).

Water contact angle (WCA) images are shown in **Figure S2**. The addition of the  $\text{CF}_x$  layer is evidenced by an increase on the WCA regardless of the duty cycle used on a-C:H, a-C:H:Ag, and a-C:H:AgO samples.

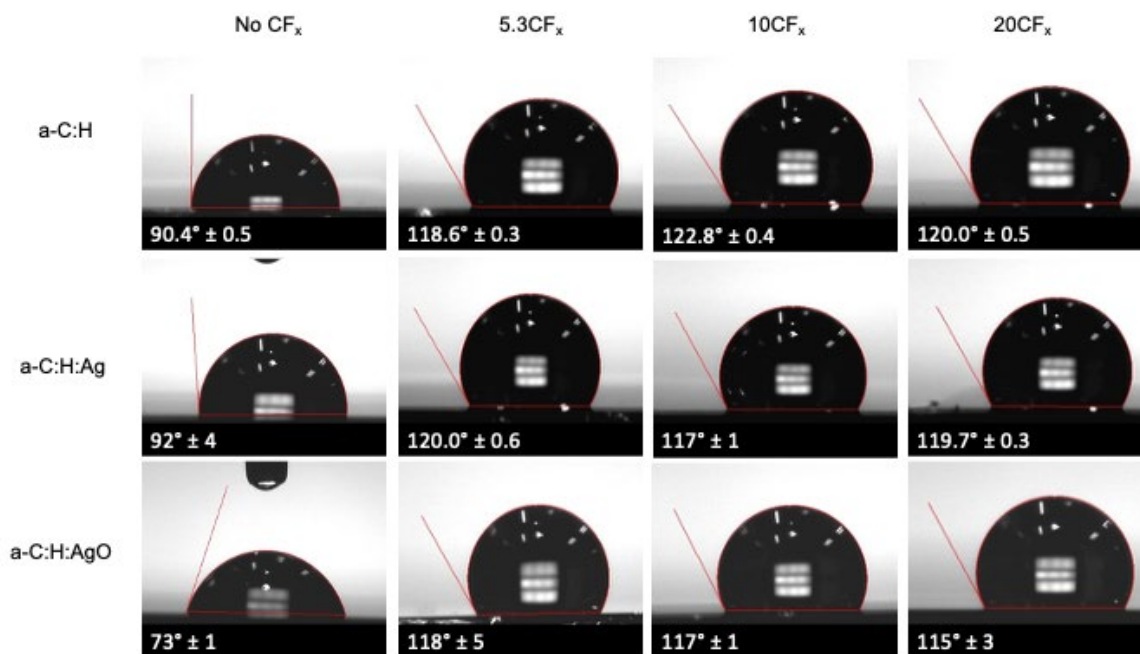

**Figure S2:** WCA images of the uncoated and  $\text{CF}_x$  coated a-C:H samples depending on the duty cycle used and their respective WCA values.

AFM was used to study the particle size distribution, surface morphology and roughness (**Figure S3**). Depending on the oxidation state of the target used, Ag and AgO NPs displayed different particle size distributions. Ag NPs exhibits a particle size average of  $27 \pm 5$  nm and a normal distribution, whereas the histogram of AgO NPs yields a particle size average of  $23 \pm 5$  nm and a bimodal size distribution, with two different modes at 20 nm and 33 nm. It is worth mentioning a higher presence of particles with sizes bigger than 30 nm for the a-C:H:AgO surface.

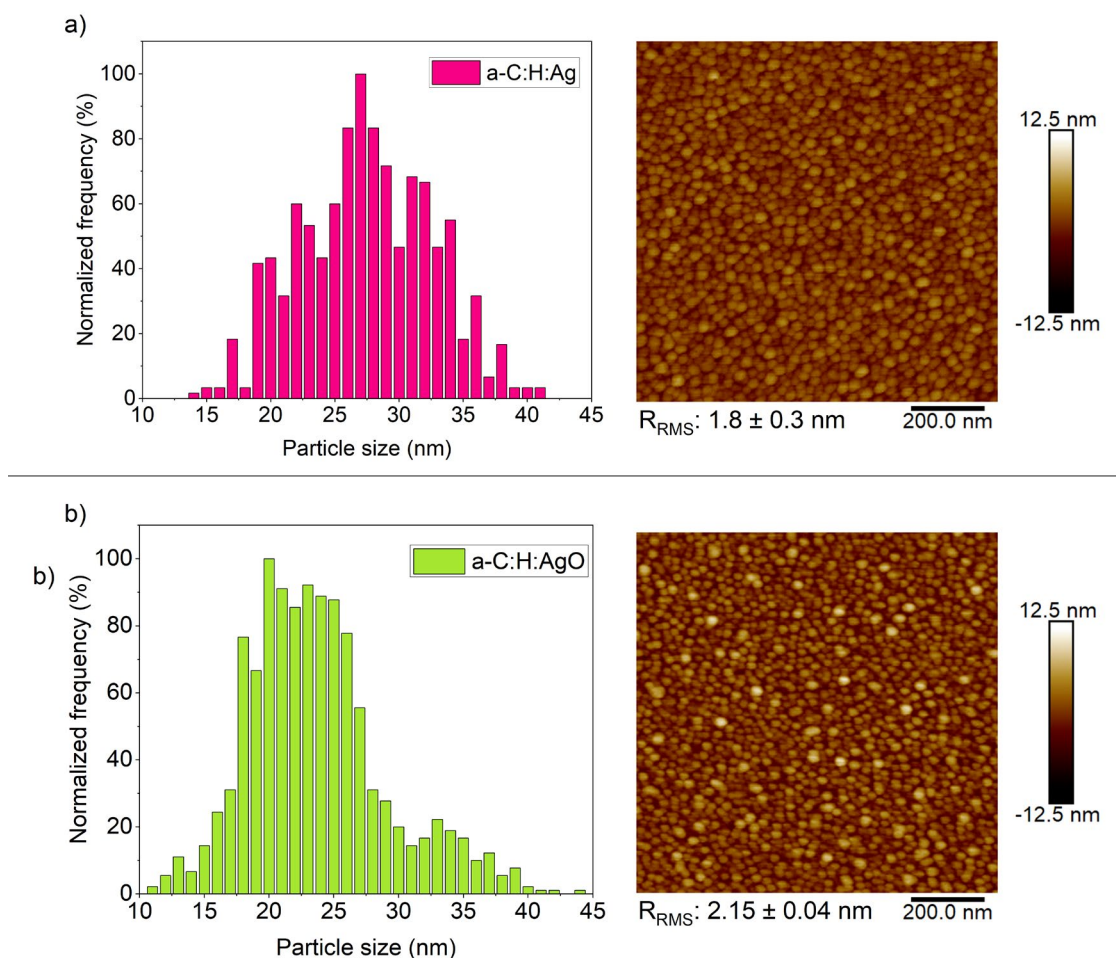

**Figure S3:** Particle size distribution and AFM images of a) a-C:H:Ag and b) a-C:H:AgO coatings before  $\text{CF}_x$  deposition.

The antibacterial activity of the 5.3CF<sub>x</sub>/a-C:H:Ag and 5.3CF<sub>x</sub>/a-C:H:AgO samples was investigated using *E. coli* after 4 h (**Figure S4**). The results show that 5.3CF<sub>x</sub>/a-C:H:AgO exhibited significantly higher bacterial inhibition with 63% in comparison with 46% inhibition for 5.3CF<sub>x</sub>/a-C:H:Ag sample.

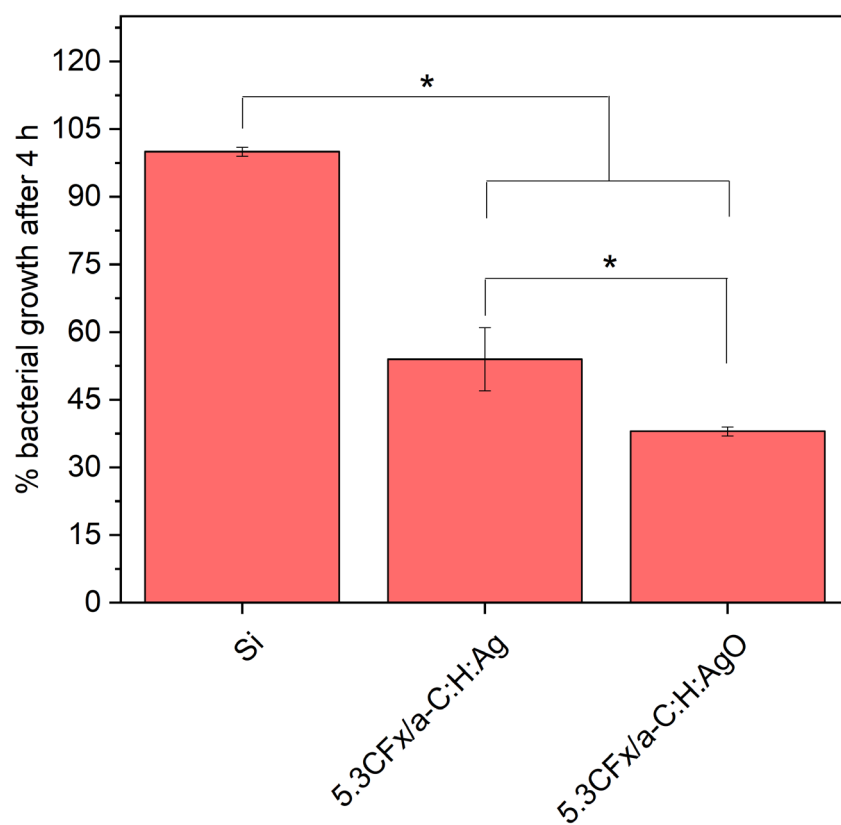

**Figure S4:** Percentage of *E. coli* growth after 4 h in contact with Si (as negative control), 5.3CF<sub>x</sub>/a-C:H:Ag and 5.3CF<sub>x</sub>/a-C:H:AgO ( $p < 0.05$ ).
